# Supplementary material
Source: publisher figshare collection journal article supplement (https://acs.figshare.com/ndownloader/files/26227549)
Supplement: Supplementary file 1 [file 26227549]

## Supporting Information

# Efficiently Passivated PbSe Quantum Dot Solids for Infrared Photovoltaics

*Sisi Liu<sup>a</sup>, Kao Xiong<sup>a</sup>, Kang Wang<sup>a</sup>, Guijie Liang<sup>b</sup>, Ming-Yu Li<sup>c</sup>, Haodong Tang<sup>d</sup>,  
Xiaokun Yang<sup>e</sup>, Zhen Huang<sup>e</sup>, Linyuan Lian<sup>a</sup>, Manlin Tan<sup>f,\*</sup>, Kai Wang<sup>d</sup>, Liang  
Gao<sup>e</sup>, Haisheng Song<sup>e</sup>, Daoli Zhang<sup>a</sup>, Jianbo Gao<sup>g</sup>, Xinzheng Lan<sup>a</sup>, Jiang Tang<sup>e</sup>  
and Jianbing Zhang<sup>a,e,\*</sup>*

- a School of Optical and Electronic Information, Huazhong University of Science and Technology, Wuhan, Hubei 430074, China.
- b Hubei Key Laboratory of Low Dimensional Optoelectronic Materials and Devices  
Hubei University of Arts and Science, Xiangyang, Hubei 441053, China
- c School of Science, Wuhan University of Technology, Wuhan, Hubei 430070, China
- d Department of Electrical and Electronic Engineering, Southern University of Science and Technology, Xueyuan Blvd. 1088, Shenzhen 518055, China
- e Wuhan National Laboratory for Optoelectronics, Huazhong University of Science and Technology, Wuhan, Hubei 430074, China
- f Research Institute of Tsinghua University in Shenzhen, Shenzhen, Guangdong 518057, China
- g Ultrafast Photophysics of Quantum Devices, Department of Physics and Astronomy, Clemson University, Clemson, SC 29634, USA

\* Correspondence: tanml@tsinghua-sz.org, jbzhang@hust.edu.cn

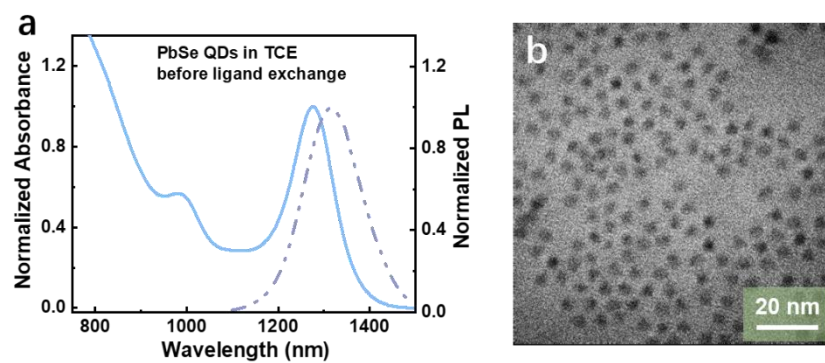

**Figure S1.** (a) Absorbance and PL spectra of the synthetic PbSe QDs in solution before ligand exchange. (b) The TEM image for PbSe QDs before ligand exchange. The average diameter of PbSe QDs could be around 4 nm.

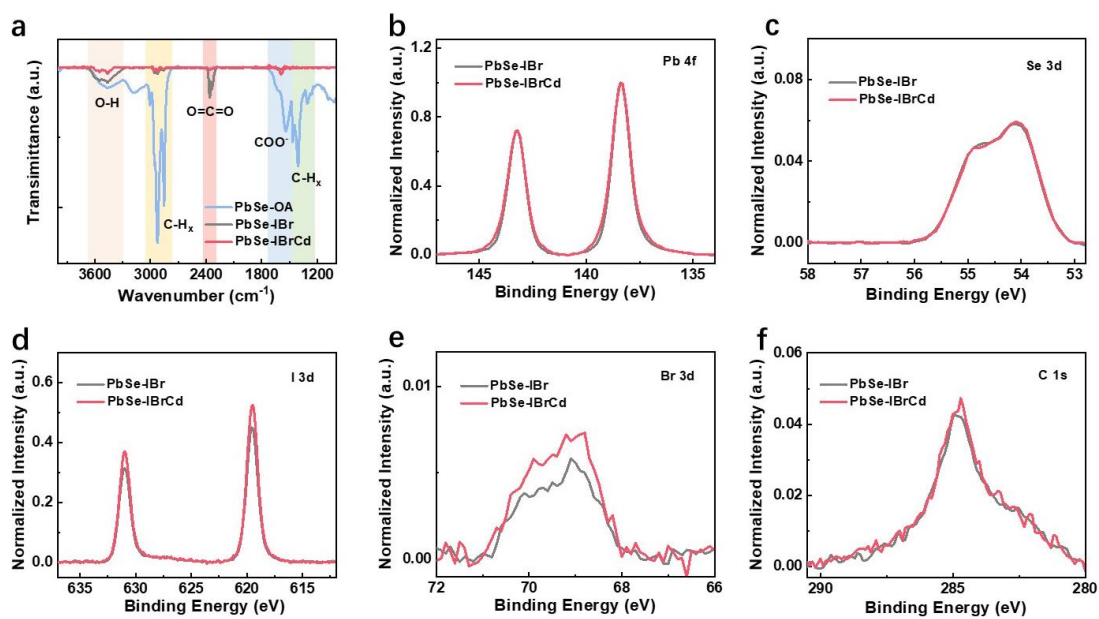

**Figure S2.** (a) FT-IR spectra of PbSe QDs capped with OA, bare halogen anion (I, Br) or hybrid ligand (I, Br, Cd). XPS spectra of the (b) Pb 4f, (c) Se 3d, (d) I 3d, (e) Br 3d and (f) C 1s for PbSe-I-Br and PbSe-I-BrCd ([Cd] = 40 mM) QD films.

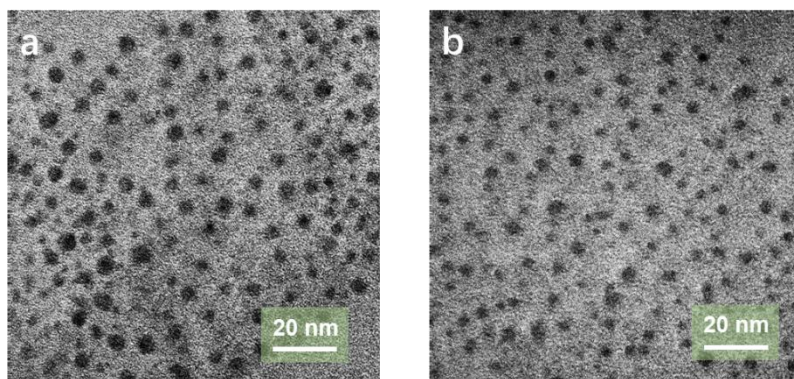

**Figure S3.** The TEM images for (a) PbSe-IBr QDs and (b) PbSe-IBrCd QDs ([Cd]=40 mM).

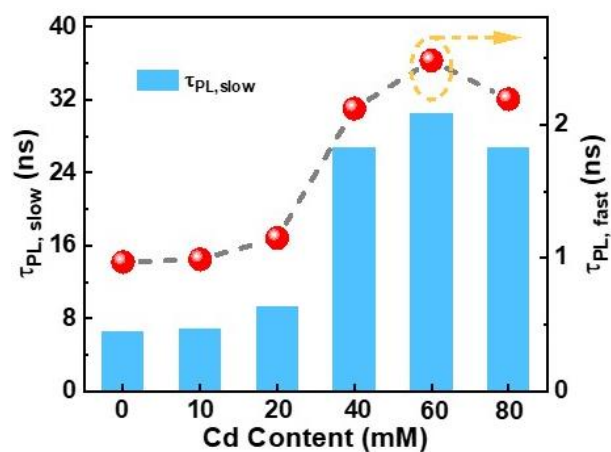

**Figure S4.** Fast and slow components of the PL decay fitted using the double exponentials. The fast component indicates the exciton dissociation, and the slow component is relevant with charge trapping.

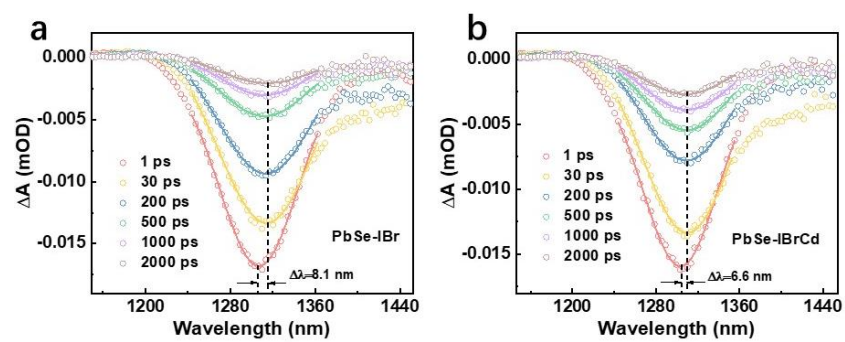

**Figure S5.** TA spectra of (a) PbSe-I-Br and (b) PbSe-I-BrCd QD films at various delay times.

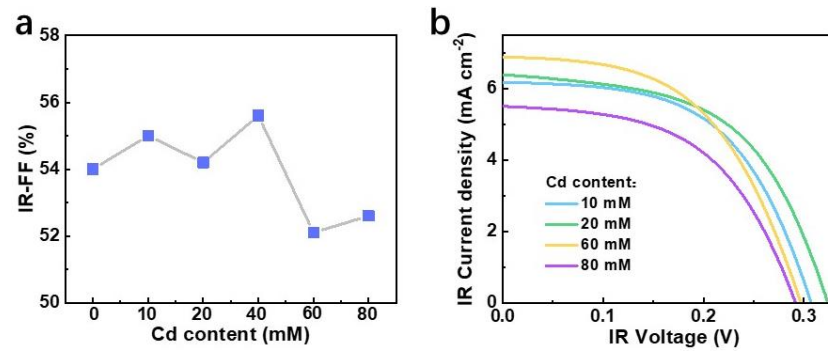

**Figure S6.** The 1100 nm-filtered (a) IR-FF and (b)  $J$ - $V$  curves for PbSe QD based solar cells.

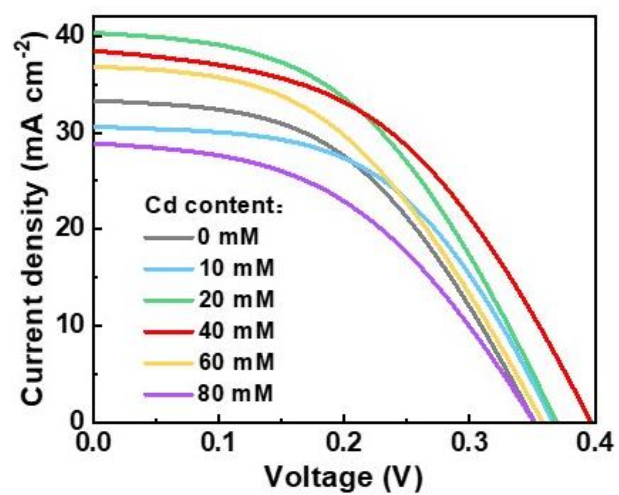

**Figure S7.**  $J$ - $V$  plots of all solar cells under AM1.5 illumination.



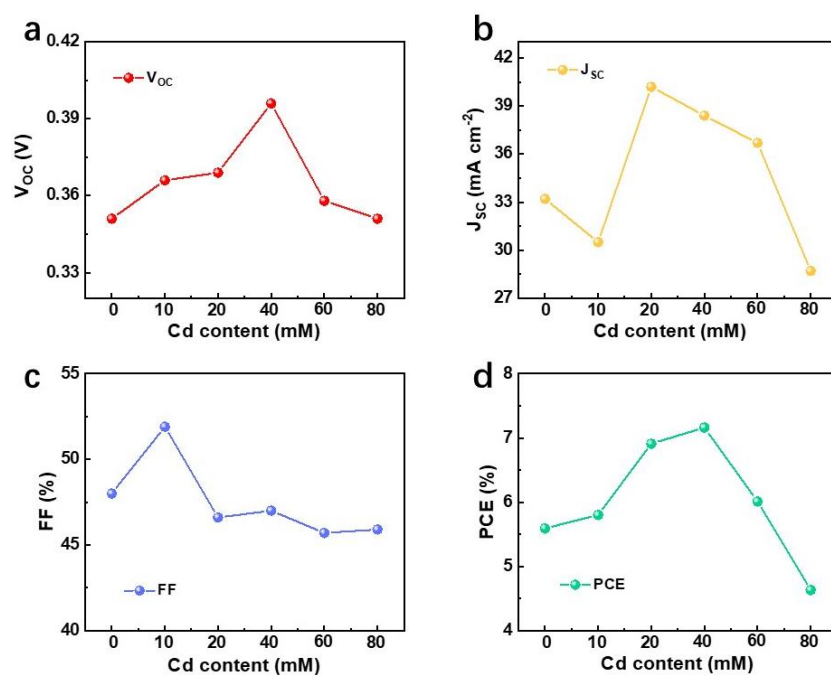

**Figure S8.** The dependence of (a)  $V_{oc}$ , (b)  $J_{sc}$ , (c) FF and (d) PCE on the Cd cations concentration for all solar cells under AM1.5 illumination.

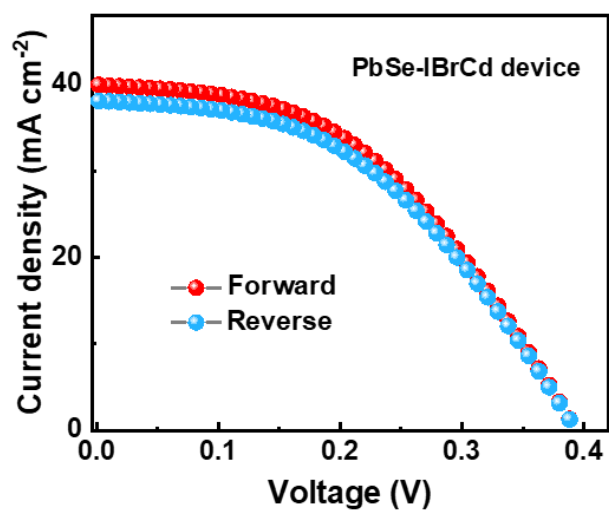

**Figure S9.**  $J$ - $V$  (forward and reverse scanning) curves of device based on PbSe-IBrCd QDs ([Cd]=40 mM) under simulated AM 1.5G illuminations.

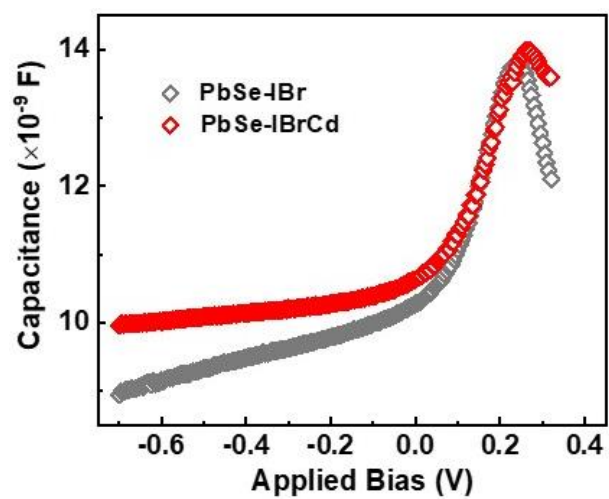

**Figure S10.** C-V curves of PbSe-I-Br and PbSe-I-BrCd QD based device.

**Table S1.** The fitted results of photoluminescence lifetime shown in Figure 3b according to a biexponential function.

| <b>Cd content</b><br><b>(mM)</b> | <b>y0</b> | <b>A1</b> | <b><math>\tau_{\text{PL, fast}}</math></b> | <b>A2</b> | <b><math>\tau_{\text{PL, slow}}</math></b> |
|----------------------------------|-----------|-----------|--------------------------------------------|-----------|--------------------------------------------|
| 0                                | 0.012     | 3.40      | 0.97                                       | 0.28      | 6.50                                       |
| 10                               | 0.011     | 3.47      | 0.99                                       | 0.25      | 6.90                                       |
| 20                               | 0.023     | 2.67      | 1.15                                       | 0.23      | 9.30                                       |
| 40                               | 0.013     | 1.54      | 2.12                                       | 0.15      | 26.73                                      |
| 60                               | 0.014     | 1.38      | 2.48                                       | 0.16      | 30.43                                      |
| 80                               | 0.014     | 1.44      | 2.19                                       | 0.17      | 26.74                                      |

**Table S2.** The performance of PbSe QD based photovoltaic measured with or without the 1100 nm filter.

| <b>Cd (mM)</b> | <b>Solar illumination</b> | <b><i>V<sub>oc</sub></i> (V)</b> | <b><i>J<sub>sc</sub></i> (mA cm<sup>-2</sup>)</b> | <b>FF (%)</b> | <b>PCE (%)</b> |
|----------------|---------------------------|----------------------------------|---------------------------------------------------|---------------|----------------|
| 0              | AM1.5                     | 0.351                            | 33.2                                              | 48            | 5.59           |
|                | 1100 nm Filter            | 0.289                            | 6.06                                              | 54            | 0.95           |
| 10             | AM1.5                     | 0.366                            | 30.5                                              | 51.9          | 5.8            |
|                | 1100 nm Filter            | 0.306                            | 6.18                                              | 55            | 1.05           |
| 20             | AM1.5                     | 0.369                            | 40.2                                              | 46.6          | 6.91           |
|                | 1100 nm Filter            | 0.323                            | 6.39                                              | 54.2          | 1.12           |
| 40             | AM1.5                     | 0.396                            | 38.4                                              | 47            | 7.16           |
|                | 1100 nm Filter            | 0.347                            | 6.78                                              | 55.6          | 1.31           |
| 60             | AM1.5                     | 0.358                            | 36.7                                              | 45.7          | 6.01           |
|                | 1100 nm Filter            | 0.297                            | 6.87                                              | 52.1          | 1.07           |
| 80             | AM1.5                     | 0.351                            | 28.7                                              | 45.9          | 4.63           |
|                | 1100 nm Filter            | 0.291                            | 5.50                                              | 52.6          | 0.85           |
